# Supplementary material for: The COVID-19 Pandemic Period, SARS-CoV-2 Infection, and Perinatal Health
Source: PubMed Central journal article supplement (PMC11082682; doi:10.1001/jamanetworkopen.2024.10696), 2024-05-09
Supplement: jamanetwopen-e2410696-s002.pdf [file jamanetwopen-e2410696-s002.pdf]

## Data Sharing Statement

Jung. The COVID-19 Pandemic Period, SARS-CoV-2 Infection, and Perinatal Health. *JAMA Netw Open*. Published May 09, 2024. doi:10.1001/jamanetworkopen.2024.10696

### Data

**Data available:** No

### Additional Information

**Explanation for why data not available:** Birth and hospital discharge data are available upon request for research projects from the California Department of Public Health, Center for Health Statistics and Informatics, and from the California Department of Health Care Access and Information.
